# Supplementary material for: Effect of support composition on the structural and catalytic properties of Ru/AlOOH–SiO2catalysts for benzene selective hydrogenation
Source: Royal Society of Chemistry journal article supplement (doi:10.1039/c8cy00059j), 2018-01-01
Supplement: c8cy00059j1.pdf [file c8cy00059j1.pdf]

## **Effect of support composition on structural and catalytic properties of Ru/AlOOH-SiO<sub>2</sub> catalysts for benzene selective hydrogenation**

Gongbing Zhou,\* Yanlu Dong , Lan Jiang, Daiping He, Ya Yang and Xin Zhou

Key Laboratory of Green Synthesis and Applications, Chongqing key laboratory of inorganic functional materials, College of Chemistry, Chongqing Normal University, Chongqing 401331, P. R. China. E-mail: [gbzhoucqu@sina.com](mailto:gbzhoucqu@sina.com)

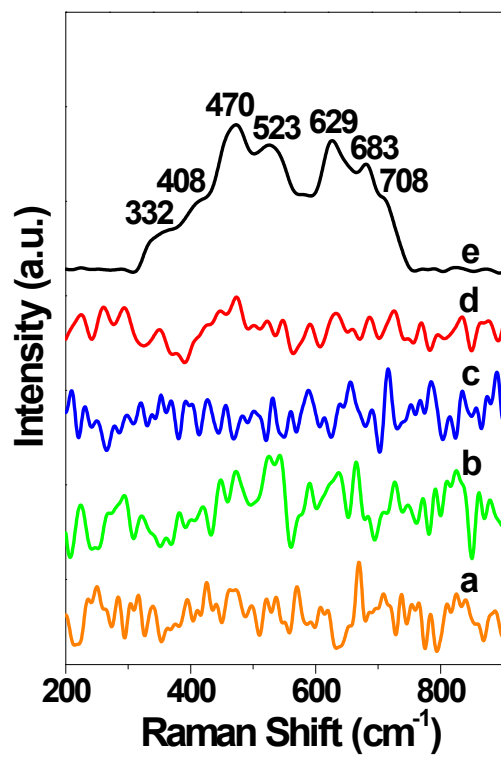

**Fig. S1** Raman spectra of the (a) Ru/ASC(0.15), (b) Ru/ASC(0.39), (c) Ru/ASC(0.88), (d) Ru/ASC(2.35), and (e) Ru/AlOOH catalysts.
